# Supplementary material for: Unique, Specific CART Receptor-Independent Regulatory Mechanism of CART(55-102) Peptide in Spinal Nociceptive Transmission and Its Relation to Dipeptidyl-Peptidase 4 (DDP4)
Source: MDPI journal article supplement (doi:10.3390/ijms24020918), 2023-01-04
Supplement: s1 [file s1]

**Supplementary Table S1.** Primary and fluorescent secondary antibodies used for immunohistochemistry and ELISA

| Primary Antibodies        | Species    | Dilution | Source                                            | Catalog No  | Characterization/<br>Specificity |
|---------------------------|------------|----------|---------------------------------------------------|-------------|----------------------------------|
| CART                      | mouse      | 1:1500   | gift from J. T. Clausen,<br>Novo Nordisk, Denmark | -           | [7]                              |
| CGRP                      | guinea pig | 1:5000   | Bachem<br>(Peninsula Laboratories)                | T-5027      | [19,79]                          |
| CAV1                      | rabbit     | 1:500    | Cell Signalling                                   | 3267        | [96]                             |
| DPP4                      | goat       | 1:500    | Novus Biological<br>(Bio-Techne)                  | NB100-61658 | [33]                             |
| GFAP                      | guinea pig | 1:2000   | Synaptic Sytems                                   | 173 004     | [97]                             |
| IL-6                      | rabbit     | 1:500    | PeproTech                                         | 500-P65     | [98]                             |
| SP                        | rat        | 1:500    | Bio-Rad (AbD Serotec)                             | 8450-0505   | [80]                             |
| TLR4                      | mouse      | 1:1000   | Abcam                                             | ab22048     | [95]                             |
| TNF $\alpha$              | rabbit     | 1:500    | PeproTech                                         | 500-P64     | [100]                            |
| Secondary Antibodies      | Species    | Dilution | Source                                            | Catalog No  |                                  |
| anti-mouse Alexa 488      | donkey     | 1:2000   | Invitrogen<br>(Thermo Fisher Scientific)          | A32766      |                                  |
| anti-mouse-Alexa 555      | donkey     | 1:500    | Invitrogen<br>(Thermo Fisher Scientific)          | A-31570     |                                  |
| anti-rat Cy5              | donkey     | 1:100    | Jackson ImmunoResearch                            | 712-175-150 |                                  |
| anti-guinea pig Alexa 648 | donkey     | 1:2000   | Invitrogen<br>(Thermo Fisher Scientific)          | A21450      |                                  |
| anti-guinea pig Cy5       | donkey     | 1:100    | Jackson ImmunoResearch                            | 706-175-148 |                                  |
| anti-rabbit Alexa 555     | donkey     | 1:2000   | Invitrogen<br>(Thermo Fisher Scientific)          | A32794      |                                  |
| anti-goat-Alexa 488       | donkey     | 1:500    | Invitrogen<br>(Thermo Fisher Scientific)          | A-11055     |                                  |
| anti-goat Alexa 555       | donkey     | 1:2000   | Invitrogen<br>(Thermo Fisher Scientific)          | A21432      |                                  |
