# Supplementary material for: Unique, Specific CART Receptor-Independent Regulatory Mechanism of CART(55-102) Peptide in Spinal Nociceptive Transmission and Its Relation to Dipeptidyl-Peptidase 4 (DDP4)
Source: MDPI journal article supplement (doi:10.3390/ijms24020918), 2023-01-04

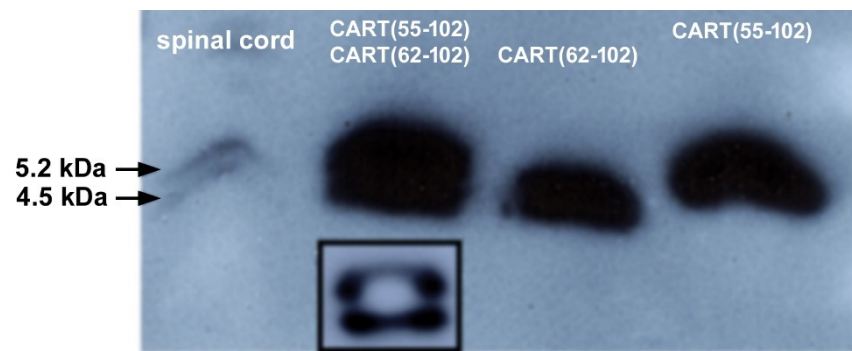

**Supplementary Figure S1. Western blot analysis confirmed existence of CART peptide fragments in the rat spinal cord.** Both CART(55-102) and CART(62-102) peptide fragments could be detected in the rat spinal cord. Insert represents the doublet of the CART(55-102) + CART(62-102) lane from a separate run with shorter exposure. Photos of the original Western blot gels from which the upper image was constructed are seen below.

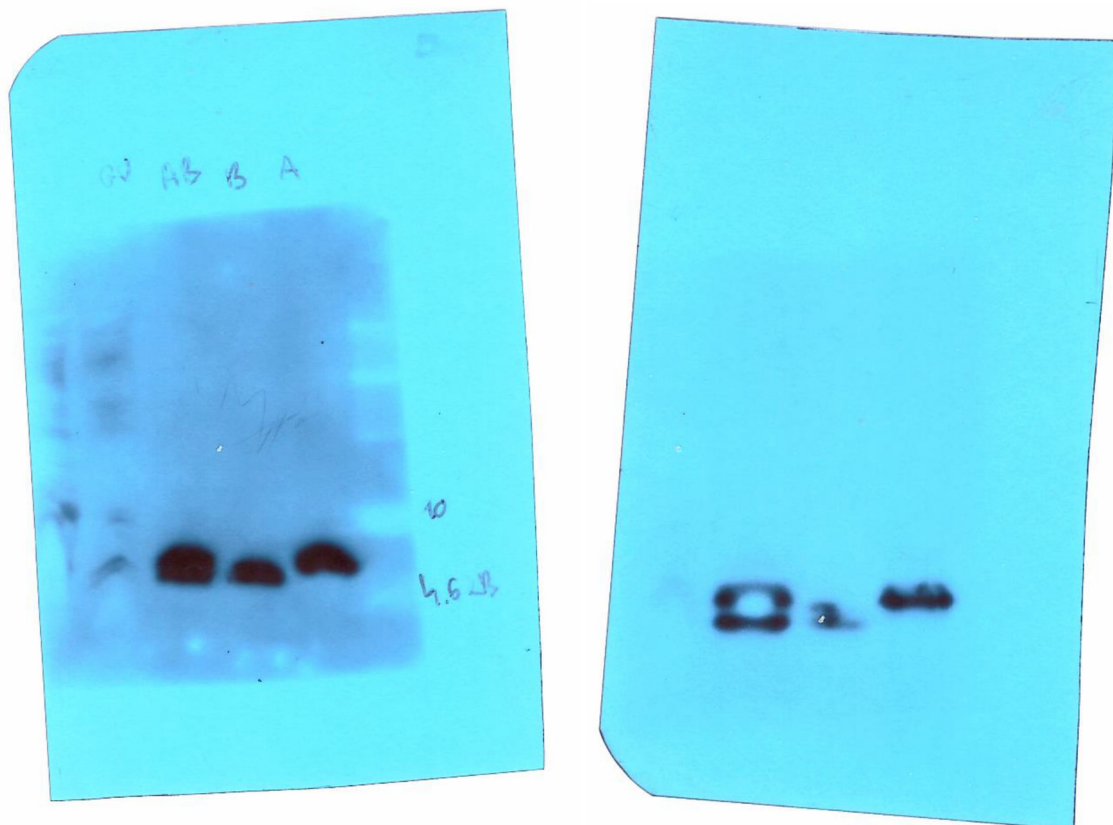

Supplement: s1 [file s1]
